# Supplementary material for: Agreement of stall‐side and laboratory major crossmatch tests with the reference standard method in horses
Source: PubMed Central journal article supplement (PMC7096648; doi:10.1111/jvim.15710), 2020-02-04
Supplement: JVIM-34-941-s001.pdf [file JVIM-34-941-s001.pdf]

**Supplementary Table 1.** Signalment, blood types and antibody profiles of horses in Aim 1 along with the number of times each was a donor or recipient.

| Horse | Serum antibodies |                 | Blood Type         | Breed   | Sex | Age     | Cross-matched | Cross-matched |
|-------|------------------|-----------------|--------------------|---------|-----|---------|---------------|---------------|
|       | Lysins           | Agglutinins     |                    |         |     | (years) | as donor      | as recipient  |
| 1     | Qab              | Qab             | ND                 | unknown | M   | unknown | 0             | 15            |
| 2     | Neg              | Aa, anti-donkey | Ca                 | Paint   | M   | 14      | 9             | 8             |
| 3     | Neg              | Neg             | Aa Ca Qabc         | QH      | M   | 8       | 7             | 8             |
| 4     | Ca               | Aa Ca           | Ab Ka Pa Qc        | WB      | G   | 16      | 8             | 7             |
| 5     | Ca               | Ca              | Aa Qabc            | TB      | M   | 3       | 0             | 6             |
| 6     | Neg              | Neg             | Aa Ca Pa Qabc      | TB      | M   | 17      | 7             | 6             |
| 7     | Neg              | Neg             | Aab Ca Pb Qabc     | TB      | M   | 21      | 2             | 5             |
| 8     | Neg              | Neg             | Aa Ca Qabc         | TB      | M   | 17      | 7             | 5             |
| 9     | Neg              | UnID            | Aa Ca Pa           | WB      | S   | 22      | 8             | 4             |
| 10    | Neg              | Neg             | Aab Ca Pa Ua       | WB      | S   | 14      | 7             | 4             |
| 11    | UnID             | Aa, anti-donkey | ND                 | unknown | M   | 22      | 0             | 3             |
| 12    | Neg              | UnID            | Aabc,Ca, Pab, Qabc | WB      | S   | 18      | 8             | 3             |
| 13    | Neg              | Aa, anti-donkey | Ab Ca, Pa, Ua      | WB      | M   | 21      | 4             | 2             |
| 14    | Neg              | UnID            | Aa Ca Pb Qabc      | TB      | G   | 18      | 3             | 2             |

|    |             |                   |                  |            |   |    |   |   |
|----|-------------|-------------------|------------------|------------|---|----|---|---|
| 15 | Neg         | UnID, anti-donkey | Aa Ca Qabc       | TB         | G | 10 | 2 | 2 |
| 16 | Neg         | Neg               | Aa Ca Pa Qabc Ua | WB         | M | 19 | 2 | 2 |
| 17 | Neg         | Neg               | Aa Ca Pa Qb      | Morgan     | M | 2  | 2 | 1 |
| 18 | Anti-donkey | Anti-donkey       | Aa Ca Pa Qabc Ua | WB         | G | 17 | 2 | 1 |
| 19 | Neg         | Neg               | Aa Ca Ka         | WB         | M | 17 | 3 | 1 |
| 20 | Neg         | Neg               | Aa Ca Qabc       | TB         | G | 7  | 2 | 1 |
| 21 | Neg         | UnID              | Aa Ca Pa Qabc    | Appaloosa  | G | 15 | 2 | 1 |
| 22 | Neg         | UnID              | Aa Ca            | TB x Welsh | M | 14 | 2 | 1 |
| 23 | Neg         | Neg               | Aa Ca            | TB         | G | 14 | 2 | 1 |
| 24 | Neg         | UnID, anti-donkey | Aa Ca Ua         | WB         | M | 17 | 1 | 1 |

---

Neg = negative; UnID = unidentified antibody; QH = quarter horse; WB = warmblood; TB = thoroughbred; M = mare; G = gelding; S = stallion
